# Supplementary material for: Serum Metabolomics of Slow vs. Rapid Motor Progression Parkinson’s Disease: a Pilot Study
Source: PLoS One. 2013 Oct 22;8(10):e77629. doi: 10.1371/journal.pone.0077629 (PMC3805572; doi:10.1371/journal.pone.0077629)
Supplement: Table S2 — Additional demographic characteristics of the study population. (XLSX) [file pone.0077629.s002.xlsx]

## Sheet: Sheet1
Characteristic	Included PD Patients	All PD patients with follow-up	P-value*
Sex
Male	46 (57.5)	136 (58.4)
Female	34 (42.5)	97 (41.6)	0.89
Age (years)
< 60	11 (13.8)	50 (21.5)
>=60	69 (86.2)	183 (78.5)	0.13
Mean (sd)	68.8 (8.3)	67.0 (9.8)
Range	46-87	35-88	0.13
Education (years)
<12	6 (7.5)	38 (16.3)
12	25 (31.3)	62 (26.6)
>12	49 (61.2)	133 (57.1)	0.14
Smoking Status
Never	45 (56.2)	124 (53.2)
Former	34 (42.5)	101 (43.4)
Current	1 (1.3)	8 (3.4)	0.58
Family history of PD
None	69 (86.2)	200 (85.8)
1 or more members	11 (13.8)	33 (14.2)	0.93
Baseline UPDRS motor score
Mean (sd)	17.7 (8.0)	19.8 (9.5)
Range	1937-04-01	1949-03-01	0.08
Duration bewteen diagnosis and baseline exam (years)
Mean (sd)	1.8 (1.3)	1.9 (1.4)
Range	0-6.6	0-7.1	0.82
Duration between baseline and follow-up exam (years)
Mean (sd)	4.8 (2.0)	5.1 (2.2)
Range	1.1-9.0	0.8-9.1	0.44
*p-value from chi-square or t-test as appropriate.
